# Supplementary material for: The Development and External Validation of Artificial Intelligence-Driven MRI-Based Models to Improve Prediction of Lesion-Specific Extraprostatic Extension in Patients with Prostate Cancer
Source: MDPI journal article supplement (doi:10.3390/cancers15225452), 2023-11-17
Supplement: s1 [file s1]

**Table S1.** MRI sequence parameters of T2-weighted imaging and diffusion-weighted imaging of the training cohort.

|                                         | St. Antonius Hospital,<br>Utrecht (n = 357) |                                                    | St. Antonius Hospital,<br>Nieuwegein (n = 16) |                                   | Canisius Wilhelmina<br>Hospital (n = 151) |            |
|-----------------------------------------|---------------------------------------------|----------------------------------------------------|-----------------------------------------------|-----------------------------------|-------------------------------------------|------------|
| MRI System                              | Siemens 3T                                  |                                                    | Philips 3T                                    |                                   | Philips 3T                                |            |
| Sequence                                | T2w                                         | DWI                                                | T2w                                           | DWI                               | T2w                                       | DWI        |
| TR (ms)                                 | 5000                                        | 3500                                               | 4207                                          | 3000<br>b-1400: 3500              | 3600                                      | 3618       |
| TE/TEeq (ms)                            | 103                                         | 63                                                 | 110/78                                        | 84<br>b-1400: 87                  | 120/100                                   | 73         |
| Excitation/refocusing<br>flip angle (°) | 90/150                                      | 90/180                                             | 90/110                                        | 90/180                            | 90/variable                               | 90/180     |
| Echo train<br>length/EPI factor         | 25                                          | 72                                                 | 29                                            | 61                                | 18                                        | 61         |
| FOV (mm)                                | 200                                         | 256                                                | 200                                           | 160                               | 200                                       | 200        |
| Slice orientation                       | Axial,<br>coronal,<br>sagittal              | Axial                                              | Axial,<br>coronal,<br>sagittal                | Axial                             | Axial,<br>coronal,<br>sagittal            | Axial      |
| Acquired voxel size<br>(mm)             | 0.78 × 0.63                                 | 2.0 × 2.0                                          | 0.78 × 0.63                                   | 2.0 × 2.0                         | 0.4 × 0.55                                | 2.0 × 2.0  |
| Reconstructed voxel<br>size (mm)        | 0.63 × 0.63                                 | 2.0 × 2.0                                          | 0.63 × 0.63                                   | 2.0 × 2.0<br>b-1400: 2.5<br>× 2.5 | 0.3 × 0.3                                 | 1.8 × 1.8  |
| Slice thickness (mm)                    | 3.0                                         | 3.0                                                | 3.0                                           | 3.0                               | 3.0                                       | 4.0        |
| Number of slices<br>(axial)             | 26                                          | 26                                                 | 26                                            | 26                                | 26                                        | 20         |
| b-values (s/mm <sup>2</sup> )           | -                                           | 50-800<br>(acquired)<br><br>- 1400<br>(calculated) | -                                             | 0-50-400-<br>800-1400             | -                                         | 0-800-1400 |
| Number of averages<br>(per b-value)     | 2                                           | 5-10                                               | 1                                             | 2-2-3-5-3                         | 2                                         | 3-10-10    |
| Acquisition time<br>(min:sec)           | 3:30                                        | 2:57                                               | 2:28                                          | 3:18<br>b-1400: 3:16              | 5:04                                      | 3:55       |
| Parallel imaging<br>acceleration factor | 2                                           | 2                                                  | 1.8                                           | 3                                 | 1                                         | 2.5        |

**Table S2.** MRI-based radiomic features in this study

| Radiomics                             | Unit                     | Definition                                                                                                                                                 |
|---------------------------------------|--------------------------|------------------------------------------------------------------------------------------------------------------------------------------------------------|
| Average ADC lesion inside             | $\mu\text{m}^2/\text{s}$ | Average apparent diffusion coefficient of lesion located in the prostate.                                                                                  |
| Average ADC lesion outside            | $\mu\text{m}^2/\text{s}$ | Average apparent diffusion coefficient of lesion part beyond the prostate capsule.                                                                         |
| Average ADC prostate                  | $\mu\text{m}^2/\text{s}$ | Average apparent diffusion coefficient of the prostate.                                                                                                    |
| Average high b value lesion inside    | $\text{s}/\text{mm}^2$   | Average of high b-value intensities of lesion located in the prostate.                                                                                     |
| Average high b value lesion outside   | $\text{s}/\text{mm}^2$   | Average of high b-value intensities of lesion part beyond the prostate capsule.                                                                            |
| Average high b value prostate         | $\text{s}/\text{mm}^2$   | Average of high b-value intensities of the prostate.                                                                                                       |
| Axial lesion diameter                 | mm                       | Maximum lesion diameter across all slices in the axial plane.                                                                                              |
| Axial TCL                             | mm                       | Maximum contact length between the prostate capsule and lesion across all slices in the axial plane.                                                       |
| Axial TCSA                            | $\text{mm}^2$            | Sum of all per-slice axial tumour contact lengths.                                                                                                         |
| Coronal lesion diameter               | mm                       | Maximum lesion diameter across all slices in the coronal plane.                                                                                            |
| Coronal TCL                           | mm                       | Maximum contact length between the prostate capsule and lesion across all slices in the coronal plane.                                                     |
| Coronal TCSA                          | $\text{mm}^2$            | Sum of all per-slice coronal tumour contact lengths.                                                                                                       |
| Lesion volume                         | $\text{mm}^3$            | Lesion volume (lesion volume inside + lesion volume outside).                                                                                              |
| Lesion volume inside                  | $\text{mm}^3$            | Volume of lesion located in the prostate.                                                                                                                  |
| Lesion volume outside / Radial volume | $\text{mm}^3$            | Volume of lesion part beyond the prostate capsule.                                                                                                         |
| Lesion zone                           | Category                 | <ul style="list-style-type: none"> <li>Peripheral zone apex</li> <li>Peripheral zone mid</li> <li>Peripheral zone base</li> <li>Transition zone</li> </ul> |
| Maximum ADC lesion inside             | $\mu\text{m}^2/\text{s}$ | Maximum apparent diffusion coefficient of lesion located in the prostate.                                                                                  |
| Maximum ADC lesion outside            | $\mu\text{m}^2/\text{s}$ | Maximum apparent diffusion coefficient of lesion part beyond the prostate capsule.                                                                         |
| Maximum ADC prostate                  | $\mu\text{m}^2/\text{s}$ | Maximum apparent diffusion coefficient of the prostate.                                                                                                    |
| Maximum high b value lesion inside    | $\text{s}/\text{mm}^2$   | Maximum of high b-value intensities of lesion located in the prostate.                                                                                     |
| Maximum high b value lesion outside   | $\text{s}/\text{mm}^2$   | Maximum of high b-value intensities of lesion part beyond the prostate capsule.                                                                            |
| Maximum high b value prostate         | $\text{s}/\text{mm}^2$   | Maximum of high b-value intensities of the prostate.                                                                                                       |
| Median ADC lesion inside              | $\mu\text{m}^2/\text{s}$ | Median apparent diffusion coefficient of lesion located in the prostate.                                                                                   |
| Median ADC lesion outside             | $\mu\text{m}^2/\text{s}$ | Median apparent diffusion coefficient of lesion part beyond the prostate capsule.                                                                          |
| Median ADC prostate                   | $\mu\text{m}^2/\text{s}$ | Median apparent diffusion coefficient of the prostate.                                                                                                     |
| Median high b value lesion inside     | $\text{s}/\text{mm}^2$   | The median of high b-value intensities of lesion located in the prostate.                                                                                  |
| Median high b value lesion outside    | $\text{s}/\text{mm}^2$   | Median of high b-value intensities of lesion part beyond the prostate capsule.                                                                             |
| Median high b value prostate          | $\text{s}/\text{mm}^2$   | Median of high b-value intensities of the prostate.                                                                                                        |
| Minimum ADC lesion inside             | $\mu\text{m}^2/\text{s}$ | Minimum apparent diffusion coefficient of lesion located in the prostate.                                                                                  |
| Minimum ADC lesion outside            | $\mu\text{m}^2/\text{s}$ | Minimum apparent diffusion coefficient of lesion part beyond the prostate capsule.                                                                         |
| Minimum ADC prostate                  | $\mu\text{m}^2/\text{s}$ | Minimum apparent diffusion coefficient of the prostate.                                                                                                    |

|                                     |                    |                                                                                                                                       |
|-------------------------------------|--------------------|---------------------------------------------------------------------------------------------------------------------------------------|
| Minimum high b value lesion inside  | s/mm <sup>2</sup>  | Minimum of high b-value intensities of lesion located in the prostate.                                                                |
| Minimum high b value lesion outside | s/mm <sup>2</sup>  | Minimum value of high b-value intensities of lesion part beyond the prostate capsule.                                                 |
| Minimum high b value prostate       | s/mm <sup>2</sup>  | Minimum of high b-value intensities of the prostate.                                                                                  |
| Minimum 2D distance                 | mm                 | Minimum distance of the lesion boundary to the prostate capsule across all slices in the axial plane.                                 |
| Minimum 3D distance                 | mm                 | Minimum distance of the lesion boundary to the prostate capsule across all planes.                                                    |
| Prostate volume                     | mm <sup>3</sup>    | Prostate volume.                                                                                                                      |
| PSA density                         | ng/ml <sup>2</sup> | PSA value / prostate volume.                                                                                                          |
| Radial distance                     | mm                 | Maximum perpendicular distance between the prostate capsule and lesion part beyond the prostate across all slices in the axial plane. |
| Sagittal lesion diameter            | mm                 | Maximum lesion diameter across all slices in the sagittal plane.                                                                      |
| Sagittal TCL                        | mm                 | Maximum contact length between the prostate capsule and lesion across all slices in the sagittal plane.                               |
| Sagittal TCSA                       | mm <sup>2</sup>    | Sum of all per-slice sagittal tumour contact lengths.                                                                                 |
| SD ADC lesion inside                | μm <sup>2</sup> /s | Standard deviation apparent diffusion coefficient of lesion in the prostate.                                                          |
| SD ADC lesion outside               | μm <sup>2</sup> /s | Standard deviation apparent diffusion coefficient of lesion part beyond the prostate capsule.                                         |
| SD ADC prostate                     | μm <sup>2</sup> /s | Standard deviation apparent diffusion coefficient of the prostate.                                                                    |
| SD high b value lesion inside       | s/mm <sup>2</sup>  | Standard deviation of high b-value intensities of lesion located in the prostate.                                                     |
| SD high b value lesion outside      | s/mm <sup>2</sup>  | Standard deviation of high b-value intensities of lesion part beyond the prostate capsule.                                            |
| SD high b value prostate            | s/mm <sup>2</sup>  | Standard deviation of high b-value intensities of the prostate.                                                                       |
| TCSA (1 – 5 mm)                     | mm <sup>2</sup>    | Contact surface area using the Euclidean distances between the lesion surface and prostate capsule within 1 to 5 mm.                  |
| Tumor contact volume (TCV)          | mm <sup>3</sup>    | Interaction volume between the prostate capsule and lesion.                                                                           |
| TCV (1 – 5 mm)                      | mm <sup>3</sup>    | Contact volume using the Euclidean distances between the lesion and prostate capsule within 1 to 5 mm.                                |
| Q1 ADC lesion inside                | μm <sup>2</sup> /s | First quartile (25 <sup>th</sup> percentile) apparent diffusion coefficient of lesion located in the prostate.                        |
| Q1 ADC lesion outside               | μm <sup>2</sup> /s | First quartile (25 <sup>th</sup> percentile) apparent diffusion coefficient of lesion part beyond the prostate capsule.               |
| Q1 ADC prostate                     | μm <sup>2</sup> /s | First quartile (25 <sup>th</sup> percentile) apparent diffusion coefficient of the prostate.                                          |
| Q1 high b value lesion inside       | s/mm <sup>2</sup>  | First quartile (25 <sup>th</sup> percentile) of high b-value intensities of lesion located in the prostate.                           |
| Q1 high b value lesion outside      | s/mm <sup>2</sup>  | First quartile (25 <sup>th</sup> percentile) of high b-value intensities of lesion part beyond the prostate capsule.                  |
| Q1 high b value prostate            | s/mm <sup>2</sup>  | First quartile (25 <sup>th</sup> percentile) of high b-value intensities of the prostate.                                             |
| Q3 ADC lesion inside                | μm <sup>2</sup> /s | Third quartile (75 <sup>th</sup> percentile) apparent diffusion coefficient of lesion located in the prostate.                        |
| Q3 ADC lesion outside               | μm <sup>2</sup> /s | Third quartile (75 <sup>th</sup> percentile) apparent diffusion coefficient of lesion part beyond the prostate capsule.               |
| Q3 ADC prostate                     | μm <sup>2</sup> /s | Third quartile (75 <sup>th</sup> percentile) apparent diffusion coefficient of the prostate.                                          |

|                                |                   |                                                                                                                      |
|--------------------------------|-------------------|----------------------------------------------------------------------------------------------------------------------|
| Q3 high b value lesion inside  | s/mm <sup>2</sup> | Third quartile (75 <sup>th</sup> percentile) of high b-value intensities of lesion located in the prostate.          |
| Q3 high b value lesion outside | s/mm <sup>2</sup> | Third quartile (75 <sup>th</sup> percentile) of high b-value intensities of lesion part beyond the prostate capsule. |
| Q3 high b value prostate       | s/mm <sup>2</sup> | Third quartile (75 <sup>th</sup> percentile) of high b-value intensities of the prostate.                            |

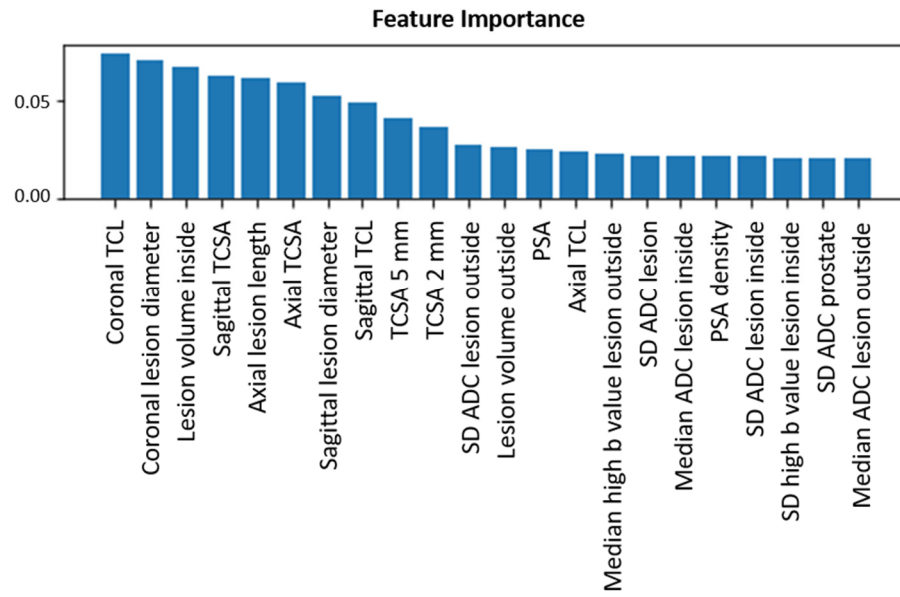

**Figure S1.** Included features of the random forest model after impurity-based feature reduction.

**Table S3.** Performance results of internal and external test cohorts with original and varied geometric variables (5% larger and 5% smaller) at lesion-specific level.

| Model               | Metric      | Internal test cohort |                    |                    | External test cohort |                    |                    |
|---------------------|-------------|----------------------|--------------------|--------------------|----------------------|--------------------|--------------------|
|                     |             | Original             | Larger             | Smaller            | Original             | Larger             | Smaller            |
| Extra Trees         | AUC         | 0.86 (0.80 – 0.92)   | 0.85 (0.79 – 0.91) | 0.86 (0.80 – 0.92) | 0.88 (0.83 – 0.93)   | 0.88 (0.83 – 0.93) | 0.88 (0.83 – 0.93) |
|                     | Accuracy    | 0.81 (0.75 – 0.87)   | 0.80 (0.73 – 0.86) | 0.79 (0.72 – 0.85) | 0.81 (0.75 – 0.86)   | 0.79 (0.73 – 0.85) | 0.80 (0.74 – 0.85) |
|                     | Sensitivity | 0.78 (0.66 – 0.87)   | 0.78 (0.66 – 0.87) | 0.70 (0.57 – 0.80) | 0.79 (0.68 – 0.87)   | 0.82 (0.71 – 0.89) | 0.76 (0.65 – 0.84) |
|                     | Specificity | 0.83 (0.75 – 0.89)   | 0.81 (0.73 – 0.88) | 0.84 (0.76 – 0.90) | 0.82 (0.74 – 0.88)   | 0.78 (0.70 – 0.84) | 0.83 (0.75 – 0.89) |
|                     | PPV         | 0.73 (0.62 – 0.83)   | 0.71 (0.59 – 0.81) | 0.72 (0.60 – 0.82) | 0.73 (0.62 – 0.81)   | 0.69 (0.59 – 0.78) | 0.73 (0.62 – 0.82) |
|                     | NPV         | 0.87 (0.79 – 0.92)   | 0.86 (0.78 – 0.92) | 0.83 (0.74 – 0.89) | 0.87 (0.79 – 0.92)   | 0.88 (0.80 – 0.93) | 0.85 (0.78 – 0.91) |
| Random Forest       | AUC         | 0.86 (0.80 – 0.92)   | 0.86 (0.80 – 0.92) | 0.85 (0.79 – 0.91) | 0.88 (0.83 – 0.93)   | 0.88 (0.83 – 0.93) | 0.88 (0.83 – 0.93) |
|                     | Accuracy    | 0.80 (0.73 – 0.85)   | 0.80 (0.73 – 0.85) | 0.80 (0.73 – 0.85) | 0.83 (0.76 – 0.87)   | 0.81 (0.75 – 0.86) | 0.81 (0.75 – 0.86) |
|                     | Sensitivity | 0.72 (0.59 – 0.81)   | 0.75 (0.63 – 0.84) | 0.72 (0.59 – 0.81) | 0.72 (0.60 – 0.81)   | 0.73 (0.62 – 0.82) | 0.69 (0.58 – 0.79) |
|                     | Specificity | 0.84 (0.76 – 0.90)   | 0.82 (0.74 – 0.89) | 0.84 (0.76 – 0.90) | 0.89 (0.82 – 0.93)   | 0.86 (0.78 – 0.91) | 0.88 (0.81 – 0.93) |
|                     | PPV         | 0.73 (0.60 – 0.83)   | 0.71 (0.59 – 0.81) | 0.73 (0.60 – 0.83) | 0.80 (0.68 – 0.88)   | 0.75 (0.64 – 0.84) | 0.78 (0.66 – 0.86) |
|                     | NPV         | 0.83 (0.75 – 0.89)   | 0.85 (0.76 – 0.91) | 0.83 (0.75 – 0.89) | 0.84 (0.77 – 0.89)   | 0.84 (0.77 – 0.90) | 0.83 (0.75 – 0.88) |
| Logistic Regression | AUC         | 0.87 (0.81 – 0.93)   | 0.87 (0.81 – 0.93) | 0.87 (0.81 – 0.93) | 0.91 (0.87 – 0.95)   | 0.91 (0.87 – 0.95) | 0.91 (0.87 – 0.95) |
|                     | Accuracy    | 0.80 (0.73 – 0.86)   | 0.80 (0.73 – 0.85) | 0.80 (0.73 – 0.85) | 0.83 (0.76 – 0.87)   | 0.83 (0.76 – 0.87) | 0.81 (0.75 – 0.86) |
|                     | Sensitivity | 0.77 (0.65 – 0.86)   | 0.80 (0.68 – 0.88) | 0.72 (0.59 – 0.81) | 0.65 (0.53 – 0.75)   | 0.70 (0.59 – 0.80) | 0.58 (0.46 – 0.69) |
|                     | Specificity | 0.82 (0.74 – 0.89)   | 0.79 (0.71 – 0.86) | 0.84 (0.76 – 0.90) | 0.93 (0.87 – 0.97)   | 0.90 (0.83 – 0.87) | 0.95 (0.89 – 0.98) |
|                     | PPV         | 0.72 (0.60 – 0.81)   | 0.70 (0.58 – 0.79) | 0.73 (0.60 – 0.83) | 0.85 (0.73 – 0.92)   | 0.81 (0.69 – 0.89) | 0.87 (0.75 – 0.94) |
|                     | NPV         | 0.86 (0.77 – 0.91)   | 0.87 (0.79 – 0.92) | 0.83 (0.75 – 0.89) | 0.81 (0.74 – 0.87)   | 0.83 (0.76 – 0.89) | 0.79 (0.71 – 0.85) |

Abbreviations: AUC = area under the curve; PPV = positive predictive value; NPV = negative predictive value. Data was presented as mean and 95% confidence interval.
